# Supplementary material for: AXIN1 in Plasma or Serum Is a Potential New Biomarker for Endometriosis
Source: PubMed Central journal article supplement (PMC6337238; doi:10.3390/ijms20010189), 2019-01-07
Supplement: ijms-20-00189-s001.pdf [file ijms-20-00189-s001.pdf]

## Supplementary Materials

# AXIN1 in Plasma or Serum Is a Potential New Biomarker for Endometriosis

**Table S1.** Inflammation-related proteins measured by Proximity Extension Assay.

| <b>Protein</b>                                               | <b>Abbreviation</b> |
|--------------------------------------------------------------|---------------------|
| Interleukin-8                                                | IL-8                |
| Vascular endothelial growth factor A                         | VEGF-A              |
| Brain-derived neurotrophic factor                            | BDNF                |
| Monocyte chemotactic protein 3                               | MCP-3               |
| Glial cell line-derived neurotrophic factor                  | hGDNF               |
| CUB domain-containing protein 1                              | CDCP1               |
| Natural killer cell receptor 2B4                             | CD244               |
| Interleukin-7                                                | IL-7                |
| Osteoprotegerin                                              | OPG                 |
| Latency-associated peptide transforming growth factor beta 1 | LAP TGF-beta-1      |
| Urokinase-type plasminogen activator                         | uPA                 |
| Interleukin-6                                                | IL-6                |
| Interleukin-17C                                              | IL-17C              |
| Monocyte chemotactic protein 1                               | MCP-1               |
| Interleukin-17A                                              | IL-17A              |
| C-X-C motif chemokine 11                                     | CXCL11              |
| Axin-1                                                       | AXIN1               |
| TNF-related apoptosis-inducing ligand                        | TRAIL               |
| Interleukin-20 receptor subunit alpha                        | IL-20RA             |
| C-X-C motif chemokine 9                                      | CXCL9               |
| Cystatin D                                                   | CST5                |
| Interleukin-2 receptor subunit beta                          | IL-2RB              |
| Interleukin-1 alpha                                          | IL-1 alpha          |
| Oncostatin-M                                                 | OSM                 |
| Interleukin-2                                                | IL-2                |
| C-X-C motif chemokine 1                                      | CXCL1               |
| Thymic stromal lymphopoietin                                 | TSLP                |
| C-C motif chemokine 4                                        | CCL4                |
| T cell surface glycoprotein CD6 isoform                      | CD6                 |
| Stem cell factor                                             | SCF                 |
| Interleukin-18                                               | IL-18               |
| Signaling lymphocytic activation molecule                    | SLAMF1              |
| Transforming growth factor alpha                             | TGF-alpha           |
| Monocyte chemotactic protein 4                               | MCP-4               |
| Eotaxin-1                                                    | CCL11               |
| Tumor necrosis factor ligand superfamily member 14           | TNFSF14             |
| Fibroblast growth factor 23                                  | FGF-23              |
| Interleukin-10 receptor subunit alpha                        | IL-10RA             |

---

|                                                               |             |
|---------------------------------------------------------------|-------------|
| Fibroblast growth factor 5                                    | FGF-5       |
| Matrix metalloproteinase-1                                    | MMP-1       |
| Leukemia inhibitory factor receptor                           | LIF-R       |
| Fibroblast growth factor 21                                   | FGF-21      |
| C-C motif chemokine 19                                        | CCL19       |
| Interleukin-15 receptor subunit alpha                         | IL-15RA     |
| Interleukin-10 receptor subunit beta                          | IL-10RB     |
| Interleukin-22 receptor subunit alpha-1                       | IL-22 RA1   |
| Interleukin-18 receptor 1                                     | IL-18R1     |
| Programmed cell death 1 ligand 1                              | PD-L1       |
| Beta-nerve growth factor                                      | Beta-NGF    |
| C-X-C motif chemokine 5                                       | CXCL5       |
| TNF-related activation-induced cytokine                       | TRANCE      |
| Hepatocyte growth factor                                      | HGF         |
| Interleukin-12 subunit beta                                   | IL-12B      |
| Interleukin-24                                                | IL-24       |
| Interleukin-13                                                | IL-13       |
| Artemin                                                       | ARTN        |
| Matrix metalloproteinase-10                                   | MMP-10      |
| Interleukin-10                                                | IL-10       |
| Tumor necrosis factor                                         | TNF         |
| C-C motif chemokine 23                                        | CCL23       |
| T-cell surface glycoprotein CD5                               | CD5         |
| Macrophage inflammatory protein 1-alpha                       | MIP-1 alpha |
| Fms-related tyrosine kinase 3 ligand                          | Flt3L       |
| C-X-C motif chemokine 6                                       | CXCL6       |
| C-X-C motif chemokine 10                                      | CXCL10      |
| Eukaryotic translation initiation factor 4E-binding protein 1 | 4E-BP1      |
| Interleukin-20                                                | IL-20       |
| SIR2-like protein 2                                           | SIRT2       |
| C-C motif chemokine 28                                        | CCL28       |
| Delta and Notch-like epidermal growth factor-related receptor | DNER        |
| Protein S100-A12                                              | EN-RAGE     |
| CD40L receptor                                                | CD40        |
| Interleukin-33                                                | IL-33       |
| Interferon gamma                                              | IFN-gamma   |
| Fibroblast growth factor 19                                   | FGF-19      |
| Interleukin-4                                                 | IL-4        |
| Leukemia inhibitory factor                                    | LIF         |
| Neurturin                                                     | NRTN        |
| Monocyte chemotactic protein 2                                | MCP-2       |
| Caspase 8                                                     | CASP-8      |
| C-C motif chemokine 25                                        | CCL25       |
| Fractalkine                                                   | CX3CL1      |
| Tumor necrosis factor receptor superfamily member 9           | TNFRSF9     |

---

|                                                       |        |
|-------------------------------------------------------|--------|
| Neurotrophin-3                                        | NT-3   |
| Tumor necrosis factor (Ligand) superfamily, member 12 | TWEAK  |
| C-C motif chemokine 20                                | CCL20  |
| Sulfotransferase 1A1                                  | ST1A1  |
| STAM-binding protein                                  | STAMPB |
| Interleukin-5                                         | IL-5   |
| Adenosine Deaminase                                   | ADA    |
| TNF-beta                                              | TNFB   |
| Macrophage colony-stimulating factor 1                | CSF-1  |

**Table S2.** Excluded proteins in Proximity Extension Assay.

| <b>Protein</b>                          | <b>Abbreviation</b> | <b>Reason for Exclusion</b> |
|-----------------------------------------|---------------------|-----------------------------|
| Artemin                                 | ARTN                | >20% of values below LOD    |
| Brain-derived neurotrophic factor       | BDNF                | >20% of values below LOD    |
| Interferon gamma                        | IFN- $\gamma$       | >20% of values below LOD    |
| Interleukin-1 alpha                     | IL-1 alpha          | >20% of values below LOD    |
| Interleukin-2                           | IL-2                | >20% of values below LOD    |
| Interleukin-2 receptor subunit beta     | IL-2RB              | >20% of values below LOD    |
| Interleukin-4                           | IL-4                | >20% of values below LOD    |
| Interleukin-5                           | IL-5                | >20% of values below LOD    |
| Interleukin-8                           | IL-8                | Technical difficulties      |
| Interleukin-10 receptor subunit         | IL-10RA             |                             |
| Interleukin-13                          | IL-13               | >20% of values below LOD    |
| Interleukin-17A                         | IL-17A              | >20% of values below LOD    |
| Interleukin-17C                         | IL-17C              | >20% of values below LOD    |
| Interleukin-20                          | IL-20               | >20% of values below LOD    |
| Interleukin-20 receptor subunit alpha   | IL-20 RA            | >20% of values below LOD    |
| Interleukin-22 receptor subunit alpha-1 | IL-22 RA1           | >20% of values below LOD    |
| Interleukin-24                          | IL-24               | >20% of values below LOD    |
| Interleukin-33                          | IL-33               | >20% of values below LOD    |
| Leukemia inhibitory factor              | LIF                 | >20% of values below LOD    |
| Monocyte chemotactic protein 3          | MCP-3               | >20% of values below LOD    |
| Neurtuin                                | NRTN                | >20% of values below LOD    |
| Thymic stromal lymphopoietin            | TSLP                | >20% of values below LOD    |
| Tumor necrosis factor                   | TNF                 | >20% of values below LOD    |

**Table S3.** Principal component analysis of inflammation-related proteins.

| <b>Protein</b> | <b>Factor 1</b> | <b>Factor 2</b> | <b>Factor 3</b> | <b>Factor 4</b> |
|----------------|-----------------|-----------------|-----------------|-----------------|
| AXIN1          | 0.239           | 0.886           | 0.002           | 0.159           |
| SIRT2          | 0.349           | 0.869           | 0.067           | 0.181           |
| STAMBP         | 0.375           | 0.863           | 0.059           | 0.107           |
| ST1A1          | 0.215           | 0.821           | 0.009           | 0.173           |
| CASP8          | 0.462           | 0.594           | 0.380           | 0.158           |
| IL-7           | 0.493           | 0.563           | 0.282           | -0.291          |
| CXCL1          | 0.468           | 0.449           | 0.043           | -0.500          |
| CXCL5          | 0.617           | 0.434           | -0.023          | -0.409          |
| CXCL6          | 0.637           | 0.431           | 0.055           | -0.323          |
| CD40           | 0.804           | 0.422           | -0.113          | 0.051           |
| TNFSF14        | 0.660           | 0.411           | 0.287           | 0.072           |
| E4BP1          | 0.783           | 0.392           | 0.109           | -0.067          |
| NT3            | 0.268           | 0.390           | -0.148          | 0.345           |
| TGFbeta1       | 0.863           | 0.322           | -0.013          | -0.132          |
| ENRANGE        | 0.091           | 0.269           | -0.026          | 0.080           |
| CD244          | 0.827           | 0.258           | -0.149          | 0.159           |
| CXCL11         | 0.692           | 0.240           | 0.297           | -0.236          |
| ADA            | 0.721           | 0.217           | -0.051          | 0.054           |
| PDL1           | 0.674           | 0.093           | 0.130           | 0.303           |
| MCP2           | 0.791           | 0.044           | -0.051          | -0.176          |
| IL-18          | 0.750           | 0.033           | 0.100           | 0.082           |
| OSM            | 0.359           | 0.031           | 0.123           | 0.036           |
| MCP4           | 0.617           | 0.030           | 0.393           | -0.385          |
| TNFB           | 0.522           | 0.022           | -0.100          | 0.240           |
| MMP1           | 0.651           | 0.020           | 0.156           | -0.324          |
| $\beta$ -NGF   | 0.296           | 0.019           | 0.148           | 0.174           |
| TRANCE         | 0.440           | 0.012           | -0.157          | 0.121           |
| VEGFA          | 0.898           | -0.003          | -0.096          | -0.178          |
| FGF23          | 0.537           | -0.005          | 0.121           | 0.118           |
| CSF1           | 0.881           | -0.008          | -0.313          | 0.075           |
| DNER           | 0.846           | -0.020          | -0.365          | -0.033          |
| GDNF           | 0.435           | -0.027          | 0.180           | 0.097           |
| SCF            | 0.764           | -0.043          | -0.4112         | -0.042          |
| CCL23          | 0.839           | -0.051          | -0.285          | 0.000           |
| TWEAK          | 0.862           | -0.057          | -0.368          | -0.100          |
| CCL19          | 0.717           | -0.070          | -0.003          | 0.115           |
| IL-18RI        | 0.817           | -0.072          | -0.111          | 0.160           |
| IL-6           | 0.466           | -0.082          | 0.351           | 0.108           |
| uPA            | 0.883           | -0.087          | -0.313          | -0.094          |
| IL-10RB        | 0.865           | -0.091          | -0.186          | 0.215           |

---

|                |       |        |        |        |
|----------------|-------|--------|--------|--------|
| CST5           | 0.731 | -0.120 | -0.190 | -0.096 |
| IL12B          | 0.642 | -0.120 | -0.026 | 0.389  |
| TRAIL          | 0.887 | -0.126 | -0.239 | -0.041 |
| HGF            | 0.895 | -0.133 | 0.008  | -0.077 |
| CCL4           | 0.758 | -0.136 | 0.134  | -0.040 |
| CD5            | 0.833 | -0.136 | -0.085 | 0.311  |
| CX3CL1         | 0.802 | -0.137 | -0.178 | 0.131  |
| CD6            | 0.727 | -0.139 | -0.079 | 0.191  |
| OPG            | 0.873 | -0.160 | -0.229 | -0.090 |
| FGF19          | 0.475 | -0.164 | -0.341 | 0.016  |
| TGF- $\alpha$  | 0.761 | -0.165 | 0.052  | 0.158  |
| Flt3I          | 0.829 | -0.177 | -0.144 | -0.057 |
| LIFR           | 0.570 | -0.180 | 0.013  | 0.226  |
| CCL28          | 0.387 | -0.193 | 0.319  | -0.006 |
| MIP1- $\alpha$ | 0.562 | -0.196 | 0.418  | 0.127  |
| MMP-10         | 0.680 | -0.204 | -0.058 | -0.249 |
| SLAMF1         | 0.535 | -0.204 | 0.293  | 0.218  |
| FGF21          | 0.352 | -0.206 | 0.362  | 0.018  |
| CCL20          | 0.498 | -0.208 | 0.082  | 0.096  |
| FGF5           | 0.401 | -0.217 | 0.367  | 0.061  |
| IL-15RA        | 0.509 | -0.218 | 0.433  | 0.363  |
| MCP-1          | 0.849 | -0.234 | -0.080 | -0.209 |
| CXCL10         | 0.678 | -0.266 | 0.121  | -0.061 |
| CCL25          | 0.707 | -0.279 | 0.026  | -0.196 |
| TNFRSF9        | 0.770 | -0.289 | 0.113  | 0.153  |
| IL-10          | 0.507 | -0.345 | 0.222  | 0.231  |
| CCL11          | 0.763 | -0.363 | 0.069  | -0.306 |
| CDCP1          | 0.483 | -0.369 | 0.443  | -0.144 |
| CXCL9          | 0.657 | -0.401 | 0.314  | -0.201 |

---

**Table S4.** Gastrointestinal symptoms in microscopic colitis and protein levels.

| Protein     | Abdominal Pain         | Diarrhea                | Constipation | Bloating and Flatulence | Vomiting and Nausea    |
|-------------|------------------------|-------------------------|--------------|-------------------------|------------------------|
| MCP3        | R = 0.329<br>P = 0.024 | R = 0.317<br>P = 0.032  |              |                         |                        |
| CD6         |                        |                         |              |                         | R = 0.308<br>P = 0.035 |
| CCL11       |                        | R = 0.360<br>P = 0.017  |              |                         |                        |
| LIF-R       |                        | R = -0.346<br>P = 0.019 |              |                         |                        |
| IL-18R1     | R = 0.366<br>P = 0.011 |                         |              |                         | R = 0.294<br>P = 0.045 |
| CXCL5       |                        |                         |              | R = -0.318<br>P = 0.029 |                        |
| MIP-1 alpha |                        |                         |              |                         |                        |
| CCL25       | R = 0.297<br>P = 0.042 |                         |              |                         |                        |
| NT-3        |                        | R = -0.366<br>P = 0.012 |              |                         |                        |
| CSF 1       |                        |                         |              |                         | R = 0.308<br>P = 0.035 |

Spearman's correlation test. *p*-values < 0.1 were presented. *p*-values < 0.01 were considered statistically significant.
